# Supplementary material for: Analyzing clinical characteristics of patients with different cumulative hemodialysis durations: a cross-sectional study
Source: PeerJ. 2021 Mar 9;9:e10852. doi: 10.7717/peerj.10852 (PMC7953870; doi:10.7717/peerj.10852)
Supplement: Supplemental Information 1 [file peerj-09-10852-s001.xls]

## Sheet: raw data
										Comorbidity
Number	group	Duration of hemodialysis	code	gender	age	Age at initiation of hemodialysis	height	weight	Cause of ESRD	Hypertension	Diabetes	Chronic Heart Failure	Cerebrovascular Disease	Thyroid Disorder	Number of hospitalization	Reasons for hospitalization	hemodialysis hours each time （h）	Hb（g/L）	RBC（*10^12/L）	HCT(L/L)	WBC（*10^9/L）	g/L	mg/L	BUN(mmol/L)	Scr(umol/L)	UA(umol/L)	P(mmol/L)	K(mmol/L)	Ca(mmol/L)	BUN(mmol/L)	Scr(umol/L)	UA(umol/L)		URR	URR %	PTH(pg/ml)
1	1	3.5	01633218	F	65	61.5	160	81.2	Diabetic nephropathy(DN)	Y	Y	Y	N	N	1	pulmonary infection	4	105	3.47	0.33	5.6	38.3	278	26.4	976	463	2.06	5.4	2.21	10.4	435	159	16	0.606061	60.6061	3487
2	3	11.4	00493647	M	26	14.6	175	63.3	Chronic glomerulonephritis(CGN)	Y	N	N	N	Y	3	respiratory infections, Brain Trauma, cerebral hemorrhage	4	118	4.29	0.36	3.9	40.5	227	35.9	1261	499	2.15	4.8	2.24	12.8	530	176	23.1	0.643454	64.3454	1909.4
3	4	16	00496017	F	54	38	160	66	CGN	Y	N	N	N	Y	2	AVF occlusion	4	91	3.01	0.29	5.2	36.9	298	26.6	820	462	1.56	4.3	2.32	8.8	339	144	17.8	0.669173	66.9173	1697
4	3	10.1	00580791	M	29	18.9	175	70.3	CGN	Y	N	N	N	N	1	palpitation	4	134	4.57	0.39	5.5	43.4	421	31.5	1743	539	1.93	5	2.57	12.1	756	171	19.4	0.615873	61.5873	1298.6
5	3	10.9	00485508	F	48	37.1	158	59.6	CGN	Y	N	N	N	N	2	arrhythmia	4	100	3.24	0.3	4.9	38.9	385	30.8	1103	479	1.68	5	2.36	9.4	383	121	21.4	0.694805	69.4805	1211.7
6	1	15.8	00121124	M	70	54.2	169	87	Polycystic kidney disease	Y	N	N	N	N	0		4	108	3.44	0.31	6.2	39.6	274	16.3	652	387	0.94	3.4	1.99	7.2	313	153	9.1	0.558282	55.8282	1083.6
7	2	6	01440909	M	48	42	170	73.2	CGN	Y	N	N	N	N	0		4	107	3.66	0.32	7.1	42.3	406	29.8	1517	489	2.55	4.8	2.3	11.9	645	149	17.9	0.600671	60.0671	1073.6
8	1	4.5	03354390	M	64	59.5	171	60.7	RPGN	Y	N	Y	N	Y	0		4	107	3.45	0.33	4.7	39	206	23.1	917	483	1.54	5	1.74	8.1	351	134	15	0.649351	64.9351	1048.6
9	2	6.1	01036271	F	72	65.9	160	62.7	CGN	Y	Y	N	Y	N	1	restless legs syndrome	4	104	3.55	0.31	6.5	38.9	425	34.3	884	422	2.37	7.1	2.37	8.3	270	98	26	0.758017	75.8017	1002.9
10	2	6	01048533	M	38	32	164	80	CGN	Y	N	N	N	N	0		4	96	3.32	0.29	4.6	39.9	407	29.5	1104	588	1.97	4.1	2.28	9.6	419	150	19.9	0.674576	67.4576	990.5
11	1	4.9	00936950	M	62	57.1	176	72.5	DN	Y	Y	Y	N	N	5	emesis,diarrhea,cough,coronary heart disease, respiratory infections	4	102	3.43	0.31	53	40.1	309	28.3	1127	472	1.98	5.1	1.9	9.5	410	113	18.8	0.664311	66.4311	988.9
12	1	4.7	01728847	M	52	47.3	165	56.5	CGN	Y	N	N	N	N	2	AVF occlusion, nausea	4	116	3.83	0.35	4.8	40.5	220	23	1092	473	2.09	4	2.07	7.4	433	132	15.6	0.678261	67.8261	985.2
13	2	6	00141489	F	52	46	165	61.7	CGN	Y	Y	N	N	N	1	metrorrhagia	4	121	4.17	0.37	3.4	40.8	310	25.6	1054	542	2.15	4.7	2.31	7.2	370	134	18.4	0.71875	71.875	938.4
14	2	5.6	00483202	F	49	43.4	160	60	Polycystic kidney disease	N	N	N	N	N	1	abdominal pain	4	114	3.94	0.36	4.7	39.6	208	22.5	1072	380	1.9	4.4	2.13	6.7	378	96	15.8	0.702222	70.2222	889.3
15	2	9	01628395	M	45	36	160	51.9	CGN	Y	N	N	N	N	0		4	103	3.67	0.32	4.2	37.8	291	26	1435	471	1.78	4.2	1.99	9.1	549	125	16.9	0.65	65	811.7
16	3	12.1	00487660	F	50	37.9	163	50.1	CGN	Y	N	N	N	N	0		4	113	3.58	0.34	4.5	38.8	257	27.5	1005	482	1.32	5.3	2.42	6.8	304	113	20.7	0.752727	75.2727	778.5
17	3	13.3	00493629	M	51	37.7	167	80.2	CGN	Y	N	N	N	N	0		4	113	3.77	0.35	4.4	41	477	39.1	1590	562	3.35	6.8	2.19	15.6	710	182	23.5	0.601023	60.1023	759.8
18	3	10.7	00493660	M	71	60.3	178	52	CGN	Y	N	N	N	N	1	bronchiectasis	4	108	3.5	0.33	4.8	41.6	300	22.5	900	379	1.1	3.8	1.81	7.1	340	340	15.4	0.684444	68.4444	742.2
19	3	10.1	00487648	F	49	38.9	164	62.3	CGN	Y	N	N	N	N	1	fever	4	112	3.73	0.34	7.1	40.8	588	32.4	1374	701	2.87	4.8	2.3	10	494	195	22.4	0.691358	69.1358	739.2
20	2	9.1	00493651	F	34	24.9	155	43.3	CGN	Y	N	N	N	N	0		4	111	3.86	0.34	6.2	42.2	327	24.8	1066	421	2.22	4.5	2.24	6.1	332	89	18.7	0.754032	75.4032	734.7
21	1	4.7	00502172	M	54	49.3	170	70.3	CGN	Y	N	N	N	N	1	respiratory infections	4	99	3.25	0.3	5.8	43.5	431	25.2	1366	505	2.06	4.2	2.22	8.7	503	122	16.5	0.654762	65.4762	727
22	3	11.4	00493634	F	26	14.6	160	49	CGN	Y	N	N	N	N	1	acute appendicitis	4	91	3.53	0.29	5.2	39.3	312	28.5	1353	517	3.16	5.6		7.3	411	105	21.2	0.74386	74.386	689.9
23	2	5.5	00629216	F	43	37.5	155	56.5	CGN	Y	N	N	N	N	1	AVF occlusion	4	76	2.32	0.22	6.9	41.6	386	30.6	977	646	1.85	4.9	2.11	8.5	262	127	22.1	0.722222	72.2222	656.9
24	2	5.9	00133826	F	50	44.1	155	49.7	CGN	Y	N	Y	N	N	3	chest pain,anorexia	4	95	2.95	0.28	7.5	37.9	253	30.2	886	527	1.57	4.5	2.07	7.2	245	101	23	0.761589	76.1589	635.6
25	2	9.8	03185573	M	63	53.2	155	46.6	CGN	Y	N	N	N	N	0		4	95	3.04	0.28	3.3	39.3	258	33.5	1153	384	1.37	5.4	2.06	8.3	331	87	25.2	0.752239	75.2239	633.6
26	3	11.1	01269875	M	56	44.9	178	69.2	Polycystic kidney disease	Y	N	N	N	N	3	hemorrhoids、AVF occlusion	4	161	5.35	0.51	4.7	39.2	292	29.3	1155	365	1.77	5.4	2.71	10.5	517	116	18.8	0.641638	64.1638	633.5
27	3	13.9	00493655	M	52	38.1	167	66.5	CGN	Y	N	N	N	N	1	hyperparathyroidism	4	114	4.1	0.36	7.5	35.8	310	24.9	1266	584	2.54	5.6	2.46	8.4	504	160	16.5	0.662651	66.2651	625.3
28	3	11.3	00702319	M	37	25.7	171	68.4	CGN	N	N	N	N	N	0		4	128	3.93	0.37	5	43.3	298	27.5	1441	504	2.46	4.3	2.46	10.8	645	177	16.7	0.607273	60.7273	612.5
29	1	4.5	01827828	M	52	47.5	174	72	Polycystic kidney disease	Y	N	N	N	N	1	hyperparathyroidism	4	110	3.53	0.33	5.2	39.4	290	20.6	1194	438	2.29	4.5	2.24	8	527	151	12.6	0.61165	61.165	603
30	2	6.3	01683617	M	54	47.7	177	74.9	CGN	Y	N	N	N	N	0		4	114	3.47	0.35	5.7	39.7	274	39.6	990	371	2.99	5.7	2.05	17.3	455	140	22.3	0.563131	56.3131	596.6
31	2	9.9	00139865	M	54	44.1	172	71.7	CGN	Y	N	N	N	N	1	acute appendicitis	4	82	2.77	0.24	4.7	40.3	264	30	1266	400	2.37	4.1	2.43	11.8	499	115	18.2	0.606667	60.6667	589.8
32	2	6.2	03377599	F	65	58.8	150	52	CGN	Y	Y	Y	N	N	1	weakness	4	85	3.03	0.27	7	41	347	28.9	771	344	1.37	6.2	2.05	7.4	234	81	21.5	0.743945	74.3945	570.4
33	3	10.3	00487599	M	60	49.7	160	77	Uric acid nephropathy	Y	N	N	N	N	0		4	105	3.29	0.31	5.9	39.9	306	37.2	1466	523	2.17	3.9	2.32	14.7	594	158	22.5	0.604839	60.4839	556.8
34	3	11.8	00485574	F	52	40.2	158	59.9	CGN	N	N	N	N	N	0		4	104	3.57	0.32	5.4	40.6	322	29.5	902	577	2.39	5.6	2.82	8.3	290	138	21.2	0.718644	71.8644	551.7
35	3	13.5	00485415	M	27	13.5	172	58.5	CGN	Y	N	N	N	N	0		4	87	4.16	0.36	3.5	42.2	356	32.1	1183	489	2.24	4.7	2.29	9.8	414	137	22.3	0.694704	69.4704	537.5
36	1	4.8	02051316	F	46	41.2			CGN	Y	N	N	N	N	0		4	66	3.14	0.23	5	38.7	392	27.1	1046	744	1.76	4.9	2.2	6.9	303	142	20.2	0.745387	74.5387	530.9
37	3	10.2	00493612	M	47	36.8	173	75.6	CGN	Y	N	N	N	N	0		4	83	2.7	0.25	5.4	40.1	332	43.1	1201	470	2.46	6	2.41	14.2	408	119	28.9	0.670534	67.0534	517.9
38	2	6.3	00970511	F	48	41.7	160	53.7	CGN	Y	N	N	N	N	0		4	100	3.29	0.31	5.6	41.7	311	38	1220	470	1.39	6	2.27	12.1	431	116	25.9	0.681579	68.1579	509.3
39	2	6.2	00487424	F	33	26.8	165	56.6	CGN	Y	N	N	N	N	1	AVF occlusion	4	89	3.18	0.27	7.2	38.7	343	31.7	1221	548	2.47	6.2	2.12	8.7	377	119	23	0.725552	72.5552	491.5
40	2	7.6	00144103	F	48	40.4	159	53	CGN	Y	N	N	N	N	2	respiratory infections, acute appendicitis	4	82	2.82	0.26	3.9	41.9	248	27.3	886	487	1.94	6.1	2.28	8.4	277	123	18.9	0.692308	69.2308	491.2
41	3	10.3	00484695	F	51	40.7	160	56.7	CGN	Y	N	N	N	N	0		4	65	2.06	0.19	8.7	40.2	366	45.2	1166	430	2.35	6.4	2.31	13.2	325	96	32	0.707965	70.7965	467.4
42	3	11.8	00485570	M	43	31.2	173	66	CGN	Y	N	N	N	N	1	acute appendicitis	4	125	3.93	0.37	4.9	39.1	300	32.2	1128	475	3.09	5	2.22	10.7	408	141	21.5	0.667702	66.7702	462.6
43	2	5.6	00907562	M	68	62.4	160	53.9	CGN	N	N	N	N	N	2	AVF infections, acute appendicitis	4	117	3.78	0.35	8.1	38.1	365	31.1	1256	429	2.54	5.6	2.26	9.5	408	104	21.6	0.694534	69.4534	461
44	1	4	00780853	M	34	30	175	78	Alport syndrome	Y	N	N	N	N	2	chest tightness	4	94	3.18	0.28	4.6	39.2	392	30.7	1354	660	2.05	4.8	2.15	13.3	581	202	17.4	0.566775	56.6775	454.8
45	3	10.4	00129857	F	48	37.6	158	54.5	Lupus nephritis(LN)、SLE	N	N	N	N	N	3	cerebral hemorrhage, palpitations	4	87	4.4	0.27	6.3	41.5	413	35.7	1030	517	2.24	5.3	2.41	9.2	288	105	26.5	0.742297	74.2297	453.83
46	2	9.3	00485575	M	41	31.7			CGN	Y	N	N	N	N	0		4	103	3.3	0.3	7.3	40.8	399	26.1	1253	434	1.58	4.9	1.96	8.5	454	113	17.6	0.67433	67.433	450.6
47	2	7.2	00971045	M	69	61.8	175	73.8	DN	Y	Y	N	N	N	2	cerebral hemorrhage,weakness	4	121	3.87	0.36	6.7	41.2	374	33.1	1048	415	2.61	6.5	2.03	10.5	395	132	22.6	0.682779	68.2779	442.2
48	2	9.5	00485615	M	59	49.5	173	84.9	Polycystic kidney disease	Y	Y	Y	N	N	8	coronary heart disease, pyoderma gangrenosum, diarrhoea	4	113	3.74	0.34	6.9	40.5	448	37.2	1424	547	1.81	8.1	2.23	16.3	659	183	20.9	0.561828	56.1828	442
49	2	9	01598259	M	81	72	168	48	DN	Y	Y	Y	N	N	6	AHF, diarrhoea, atrial fibrillation	4	82	2.78	0.25	3.8	35.5	233	22.1	634	350	1.3	4.6	2.19	7.8	241	116	14.3	0.647059	64.7059	441.5
50	2	6.8	00542888	F	48	41.2	162	81	CGN	Y	N	N	N	N	0		4	110	3.71	0.32	8.7	40.4	345	34.4	1299	521	3.47	4.9	2.35	12.5	491	139	21.9	0.636628	63.6628	427.7
51	1	4.3	03324550	F	50	45.7	170	61.7	CGN	N	N	N	N	N	0		4	83	2.77	0.26	5.3	36.6	249	21.2	856	474	1.84	5.3	1.95	5.1	242	95	16.1	0.759434	75.9434	418.2
52	2	7	01326476	M	65	58	170	71.5	CGN	Y	N	N	N	N	1	diarrhoea	4	102	3.02	0.31	6.5	43.5	461	26.3	1152	625	1.46	4.9	2.11	8.1	403	143	18.2	0.692015	69.2015	413.2
53	3	12.3	01375884	M	34	21.7	169	57.2	CGN	Y	N	N	N	N	1	Hemorrhage of renal cyst	4	98	3.56	0.31	2	41.3	333	30	1498	642	2.39	5.3	2.01	10.3	542	166	19.7	0.656667	65.6667	410.8
54	4	15.2	00487628	M	48	32.8	176	74.1	CGN	Y	N	N	N	N	0		4	94	3.2	0.29	4.1	39.2	333	25	1208	504	2.04	5.8	2.3	9.9	509	147	15.1	0.604	60.4	410.3
55	4	15.1	00487650	F	62	46.9	154	54.3	CGN	Y	N	N	N	N	1	pneumonia	4	117	3.67	0.35	5	41.8	242	22.4	776	324	1.62	4.5	2.34	5	216	74	17.4	0.776786	77.6786	394.7
56	3	12.4	00485561	M	65	52.6	169	81.5	Uric acid nephropathy	N	N	N	N	N	0		4	75	2.4	0.22	3.5	38.8	305	32.4	1417	545	2.05	4.8	2.12	11.7	515	144	20.7	0.638889	63.8889	390.3
57	2	7.2	03324559	F	34	26.8	160	47.9	CGN	Y	N	N	N	N	0		4	94	3.11	0.3	4.9	36.9	342	21	906	393	1.53	5.2	2.37	4.5	227	62	16.5	0.785714	78.5714	386
58	1	3.1	02932130	M	47	43.9			CGN	Y	N	Y	N	N	0		4	101	3.35	0.29	4.3	44.6	379	35	965	486	3.11	5.3	2.07	10.7	327	118	24.3	0.694286	69.4286	384.3
59	1	3.5	03404346	M	29	25.5			CGN	N	N	N	N	N	0		4	77	2.4	0.23	4.8	41.4	367	26.2	1335	796	2.39	4.5	1.88	8.7	465	192	17.5	0.667939	66.7939	377.5
60	2	7	01459725	M	57	50	162	62.2	DN	Y	Y	Y	N	N	2	acute pancreatitis、coronary heart disease	4	120	3.88	0.33	4.9	40.5	314	34.1	1208	417	2.38	4.4	2.48	11.5	427	131	22.6	0.662757	66.2757	376.3
61	2	6.8	00742288	M	28	21.2	172	65.2	CGN	Y	N	N	N	N	2	osteonecrosis of the femoral head,dizzy	4	92	3.04	0.27	6.4	45.9	479	29.1	1383	627	2.19	4.6	2.34	9.5	439	127	19.6	0.67354	67.354	372.5
62	2	5.5	01513985	M	79	73.5	172	67.7	CGN	N	N	N	N	N	2	respiratory infections	4	88	2.53	0.27	7.6	41.6	334	26.3	1254	588	1.9	4.1	5	10.1	520	175	16.2	0.61597	61.597	366.7
63	1	3.3	01251369	M	65	61.7	170	70	DN	N	Y	N	N	N	1	poor appetite	4	106	3.42	0.3	5.8	38	297	19.1	735	429	1.67	3.4	2.04	6.7	277	117	12.4	0.649215	64.9215	363.4
64	1	3.4	01133245	F	54	50.6	160	60.7	CGN	Y	Y	Y	N	N	0		4	85	3.13	0.26	4.3	40.9	284	26.5	1154	415	2.58	3.9	1.93	8.6	404	111	17.9	0.675472	67.5472	361.7
65	2	6	00138650	F	77	71	168	60	CGN	Y	N	N	N	N	2	apopsychia, weakness	4	83	2.64	0.25	4.8	39.2	278	21.3	834	388	2.32	5.3	2.36	5.5	245	87	15.8	0.741784	74.1784	360.5
66	1	4.2	02266659	M	29	24.8	180	92.5	CGN	N	N	N	N	N	2	respiratory infections、AHF	4	75	2.89	0.23	4.2	37.2	306	33.9	1208	443	2.78	4.1	1.96	18.1	652	209	15.8	0.466077	46.6077	359.5
67	1	2.5	01977347	M	48	45.5	170	81	DN	Y	Y	N	N	N	0		4	96	3.24	0.28	95	37.3	282	30.8	950	402	2.15	5.6	2.1	12.8	426	152	18	0.584416	58.4416	352.1
68	1	2.3	00771252	M	68	65.7	178	70	CGN	Y	N	Y	N	N	2	weakness	4	78	2.5	0.22	5.3	38.1	327	26.4	894	476	1.98	4.1	2.16	10	341	132	16.4	0.621212	62.1212	344.3
69	1	2.5	01260468	F	46	43.5	162	58.5	CGN	Y	N	N	N	N	2	respiratory infections	4	98	3.26	0.3	7.8	40.3	383	23.7	642	468	2.88	5.3	2.07	6.1	183	92	17.6	0.742616	74.2616	336.8
70	1	4.8	00579020	M	65	60.2	175	73.9	CGN	N	N	N	N	N	2	respiratory infections	4	92	2.94	0.27	3.1	36.8	225	28	1102	487	2.09	4.7	1.93	10	423	134	18	0.642857	64.2857	331.7
71	1	3.9	00507741	M	62	58.1	175	65.7	CGN	Y	N	N	N	N	1	weakness	4	98	3.36	0.29	4.2	41.2	216	18.2	909	338	1.44	3.3	2.2	7.3	392	123	10.9	0.598901	59.8901	321.6
72	2	8.1	00996150	M	65	56.9	174	88.7	MM	N	N	Y	N	N	5	CHD, pulmonary infection, MM	4	101	2.97	0.31	8.7	38.7	350	35.1	1364	722	1.79	4.9	2.12	13.7	576	231	21.4	0.609687	60.9687	309.5
73	4	20.4	00956567	M	61	40.6	165	65	CGN	N	N	N	N	N	3	AVF occlusion、edema	4	153	4.46	0.46	4.7	38.8	298	30.9	1356	484	2.21	4.6	2.32	14	760	208	16.9	0.546926	54.6926	291.3
74	1	4.7	01984439	M	37	32.3	170	95	DN	Y	Y	N	N	N	0		4	83	2.82	0.24	5.4	45.9	65	23.7	972	398	1.91	4.9	2.23	8.5	385	131	15.2	0.64135	64.135	287.5
75	2	8.9	00122705	M	65	56.1	165	56.9	CGN	N	N	N	N	N	0		4	127	4.2	0.4	5.3	40.7	259	15.2	998	358	1.64	5.1	2.14	4.3	338	87	10.9	0.717105	71.7105	281.6
76	3	10.3	00487610	F	54	43.7	160	64.5	CGN	Y	N	N	N	N	2	hemorrhoids, cholecystolithiasis	4	111	3.61	0.34	7.1	38.4	396	25.8	1309	524	1.91	5.3	2.52	7.7	432	125	18.1	0.70155	70.155	278.9
77	4	15.3	00590379	F	41	25.7	166	49.4	CGN	N	N	N	N	N	0		4	108	3.35	0.33	5	40.3	337	29.4	1080	488	1.45	6.1	2.08	8.1	351	120	21.3	0.72449	72.449	276.1
78	2	6	01088519	M	62	56	165	62	CGN	Y	N	N	N	N	0		4	127	4.02	0.39	6	40.2	342	31.6	1240	489	2.42	5.7	2.07	9	438	138	22.6	0.71519	71.519	275.9
79	1	4.7	02313494	M	46	41.3	173	65	CGN	Y	N	N	N	N	0		4	115	3.82	0.34	7.4	41.3	365	32.7	1136	617	1.83	4.5	2.38	12.4	467	182	20.3	0.620795	62.0795	275.4
80	2	6.7	01313255	M	38	31.3	172	85	CGN	Y	N	N	N	N	1	weakness	4	106	3.3	0.31	6.6	42.2	378	23.1	1441	460	1.46	4.8	2.33	8.1	586	128	15	0.649351	64.9351	269.6
81	2	7.8	02430356	M	36	28.2	165	66.2	CGN	N	N	N	N	N	1	AVF occlusion	4	108	3.23	0.31	6.7	43.5	518	35.4	1376	444	2.7	5.7	2.28	14.3	581	137	21.1	0.596045	59.6045	268.3
82	3	12.8	02194779	F	57	44.2	156	46.7	DN	Y	Y	Y	Y	N	0		4	92	3.25	0.29	6.9	41.1	218	22.2	668	322	1.49	6.2	2.27	6.2	217	89	16	0.720721	72.0721	262.8
83	2	9.2	00561659	M	41	31.8	175	64.1	CGN	Y	N	N	N	N	2	auricular flutter	4	118	4.1	0.35	4.6	41	270	24	1299	484	1.61	4.9	2.24	9.1	552	164	14.9	0.620833	62.0833	250.1
84	3	11.3	00126727	M	53	41.7	162	56.3	CGN	Y	N	N	N	N	15	acute pancreatitis, Anal neoplasm, cataract, diarrhea	4	114	4.08	0.35	9	43.9	471	34.2	1366	612	1.95	4.9	2.18	11.1	491	159	23.1	0.675439	67.5439	245.5
85	2	7.4	00860915	F	59	51.6	156	57.2	CGN	Y	N	N	N	N	2	CHD, weakness	4	99	3.2	0.31	6.4	41.8	348	27.4	970	606	2.07	4.2	2.05	6.6	290	126	20.8	0.759124	75.9124	242
86	1	4.5	00130947	M	61	56.5	168	61	Polycystic kidney disease	Y	N	N	N	N	2	Hypertension, respiratory infections	4	100	3.4	0.3	4.3	44.1	342	24.5	991	446	1.53	4.5	2.22	7.7	360	119	16.8	0.685714	68.5714	237.6
87	2	9.1	00487637	F	48	38.9	156	36.7	LN、SLE	N	N	N	N	N	6	CHD、AVF occlusion	4	89	2.92	0.28	4.6	37.2	355	33.8	920	485	2.47	5	2.15	6	194	77	27.8	0.822485	82.2485	233.9
88	2	6.4	01414642	F	52	45.6	167	67	Polycystic kidney disease	N	N	N	N	N	1	Polycystic kidney disease hemorrhage	4	106	3.41	0.33	4.6	41.1	274	27	1007	432	1.61	4.5	2.56	9.1	363	123	17.9	0.662963	66.2963	230.4
89	3	10.3	00487652	F	65	54.7	150	60.4	CGN	Y	N	N	N	N	2	weakness, AVF occlusion	4	100	3.35	0.3	5.3	42	388	24.6	907	509	1.81	5.1	2.23	6.9	286	115	17.7	0.719512	71.9512	229.6
90	2	6.8	00135125	F	61	54.2	160	63.2	CGN	N	N	N	N	N	2	intestinal obstruction, AVF occlusion	4	99	3.15	0.3	5.3	41.4	442	34.1	1202	582	2.68	5.7	2.49	10.2	386	131	23.9	0.70088	70.088	227.6
91	2	8.8	01090663	M	52	43.2	173	64.7	CGN	Y	N	N	N	N	3	urinary tract infection,high blood pressure	4	118	3.81	0.34	8.6	43	421	25.5	1116	531	1.52	4.6	2.2	7.2	357	116	18.3	0.717647	71.7647	225.6
92	3	11.5	00487631	F	48	36.5	164	63.5	CGN	N	N	N	N	N	3	gastritis, enteritis	4	95	3.44	0.3	5.8	40.5	312	33.6	1245	415	2.76	5.3	2.48	11.4	472	121	22.2	0.660714	66.0714	222
93	4	16.2	01517397	M	43	26.8			CGN	Y	N	N	N	N	0		4	124	4.07	0.37	5	38.4	308	35.1	1473	528	2.25	4.6	2.47	10.8	540	132	24.3	0.692308	69.2308	221.4
94	3	11.3	01213640	M	61	49.7	167	59.7	CGN	Y	N	N	N	N	0		4	102	3.28	0.31	5	38.1	258	32.3	1018	456	2.88	1.07	1.72	9.7	340	117	22.6	0.69969	69.969	218.9
95	3	13.3	00497323	M	64	50.7	178	72.3	Polycystic kidney disease	Y	N	N	N	N	0		4	83	2.77	0.26	2.2	42	292	30.1	1193	604	1.45	4.7	2.49	10.1	432	176	20	0.664452	66.4452	216.1
96	4	16.4	01501454	M	48	31.6	162	60.1	CGN	N	N	N	N	N	2	respiratiry infections, hyperparathyroidism	4	134	5.14	0.42	4.5	40.7	264	26.7	1146	414	1.1	4.5	1.44	8.8	458	138	17.9	0.670412	67.0412	199.1
97	2	5.8	01625462	M	49	43.2	178	70	CGN	Y	N	N	N	N	2	chest tightness, skin itch	4	96	2.93	0.28	4.5	41.1	408	34.2	1364	542	2.04	5.2	2.22	14.1	589	165	20.1	0.587719	58.7719	196
98	2	9.8	00493578	F	46	36.2	158	43.7	CGN	Y	N	N	N	N	2	respiratory infections、RF	4	102	3.49	0.31	6	37.9	274	29.2	898	445	1.32	4.3	2.21	5.9	223	75	23.3	0.797945	79.7945	189
99	1	3.8	00812913	M	77	73.2	172	69	DN	N	Y	N	N	N	2	respiratory failure, abdominal pain	4	113	3.36	0.33	5.5	38.6	319	25.8	883	468	2.05	4.3	2.06	7.4	303	137	18.4	0.713178	71.3178	188.6
100	1	3.9	00493617	F	39	35.1	163	58	CGN	Y	N	Y	N	N	1	AVF occlusion	4	81	2.67	0.25	3.9	40.5	254	31.8	1196	427	2.69	4.8	1.99	8.8	355	104	23	0.72327	72.327	184.3
101	2	9.7	00131891	F	31	21.3	168	76.7	CGN	Y	N	N	N	N	3	hematuria、renal rupture	4	99	3.71	0.31	7.9	41.5	343	37.7	1293	594	3.21	4.7	2.41	14.6	543	211	23.1	0.612732	61.2732	176.2
102	2	7.8	00493602	F	47	39.2	170	74.7	LN、SLE	Y	N	N	N	N	0		4	70	2.33	0.23	4	35.9	255	25	846	423	2.09	5.4	2.22	9.1	297	123	15.9	0.636	63.6	170.8
103	1	4.8	01687718	F	49	44.2	163	69.7	CGN	Y	N	N	N	N	8	AVF occlusion, weakness	4	55	1.73	0.17	3	43.4	422	37.8	1174	520	3.11	5.5	2.47	13.4	399	130	24.4	0.645503	64.5503	169.7
104	2	8.5	00493577	M	54	45.5	165	75.7	CGN	Y	N	N	N	N	2	chest tightness, high blood pressure	4	119	3.96	0.35	7.8	41.3	449	26.2	1343	507	2.18	4.9	2.44	9.4	537	151	16.8	0.641221	64.1221	168.7
105	3	12.8	00493637	F	55	42.2	150	46.4	CGN	Y	N	N	N	N	1	respiratory infections	4	108	3.41	0.32	4.8	40	276	27	954	506	2.3	4.5	2.07	5.4	233	80	21.6	0.8	80	167
106	3	10	00493395	M	49	39	158	59.7	CGN	Y	N	N	N	N	0		4	115	3.53	0.33	6.4	39.5	246	23.5	1105	303	1.68	4.2	2.39	6.6	350	72	16.9	0.719149	71.9149	159.7
107	2	6.5	01181184	F	72	65.5	172	52	CGN	Y	Y	Y	Y	N	0		4	102	3.43	0.31	4.4	40.5	207	22.9	799	375	1.47	3.4	2.15	7.4	282	107	15.5	0.676856	67.6856	159.6
108	3	9.3	01472195	F	52	42	160	56.7	CGN	Y	N	N	N	N	0		4	67	2.28	0.21	4.5	42.1	343	26.7	1012	391	1.98	5.9	2.18	9.4	null	null	17.3	0.64794	64.794	152.6
109	3	9.9	00493585	F	53	43	155	59.2	CGN	Y	N	N	N	N	1	Hyperkalemia	4	120	4.35	0.38	6.8	41.7	339	28.5	1132	451	2.07	5.5	2.74	7.8	387	110	20.7	0.726316	72.6316	146.8
110	3	10.9	00494394	F	61	50.1	160	45.3	Polycystic kidney disease	N	N	N	N	N	0		4	132	3.93	0.38	2.9	40.8	249	21.3	746	420	1.5	3.9	2.33	5	212	92	16.3	0.765258	76.5258	138.5
111	3	8.6	00493582	M	76	67	170	51.5	CGN	Y	N	N	N	N	1	weakness	4	99	3.08	0.3	5.2	37.3	294	37.7	804	438	1.87	5.1	2.11	11.2	264	118	26.5	0.702918	70.2918	137.2
112	1	3.5	02522710	F	68	64.5	155	64.7	DN	Y	Y	N	N	N	6	respiratory infections, atrial fibrillation, AVF occlusion, abdominal pain	4	99	2.98	0.3	9.2	42.3	210	35.5	1212	590	2.89	4.1	2.41	10.3	387	128	25.2	0.709859	70.9859	136.2
113	1	4.5	02588783	F	69	64.5	158	84	CGN	Y	N	N	N	N	2	respiratory infections, uremic encephalopathy	4	95	3.44	0.29	6.1	42.2	328	29.8	1241	542	2.72	4.7	2.24	11	472	157	18.8	0.630872	63.0872	133.2
114	2	5.5	01610765	F	60	54.5	157	62	DN	Y	Y	N	N	N	2	Blockage of central venous catheter, water-sodium retention	4	84	3.19	0.25	6.6	44.6	343	33.7	920	616	2.78	5.4	2.67	11.1	306	150	22.6	0.670623	67.0623	128.5
115	3	9.5	00493594	F	42	32	155	44.8	CGN	Y	N	Y	N	N	0		4	92	3.15	0.28	5.4	40.9	482	35.3	1145	638	2.58	5.7	2.14	8.6	304	109	26.7	0.756374	75.6374	119.9
116	3	9.3	00493601	M	63	53			CGN	Y	N	N	N	N	0		4	78	2.31	0.22	3.3	40.3	217	23	723	381	1.15	2.8	2.12	5.5	193	77	17.5	0.76087	76.087	119.7
117	2	8.8	02211757	M	49	40.2			CGN	Y	N	Y	N	N	0		4	105	3.36	0.32	5.4	38.1	340	25.3	1280	418	2.34	6.2	2.05	8.6	503	120	16.7	0.660079	66.0079	115.8
118	3	11	00493598	F	31	20	158	48	LN、SLE	N	N	N	N	N	2	catheter-related infections, breast mass	4	96	3.15	0.29	7	43.1	320	36.1	1091	556	1.97	4.4	2.48	10.8	346	118	25.3	0.700831	70.0831	109.7
119	4	16.3	01674870	M	48	31.7			CGN	Y	N	N	N		0		4	111	3.58	0.32	4.6	41.8	518	27.4	1467	657	2.21	4.6	2.19	10.2	591	190	17.2	0.627737	62.7737	108
120	1	4.9	01719335	M	61	56.1	172	80	DN	Y	Y	N	N	N	2	Hypertension, edema	4	109	3.53	0.33	6.9	44.3	369	32.2	1526	687	2.59	4.7	2.03	15.3	765	279	16.9	0.524845	52.4845	102.2
121	3	12.6	00493605	M	45	32.4	172	63.6	CGN	Y	N	N	N	N	0		4	124	4.01	0.36	6.5	44.7	384	43.1	1556	501	1.41	6.1	2.59	14.5	595	119	28.6	0.663573	66.3573	100.8
122	2	6.8	01933858	F	44	37.2	166	48.5	CGN	Y	N	N	N	N	0		4	90	2.7	0.25	4.3	40.6	242	39.4	997	527	2.5	5.9	2.39	9.3	250	90	30.1	0.763959	76.3959	96.5
123	2	8	02014809	F	41	33	156	54.1	CGN	N	N	N	N	N	0		4	105	3.37	0.31	6.6	45.5	380	45.5	1360	478	2.13	6.2	2.6	12.6	370	87	32.9	0.723077	72.3077	93.8
124	3	18.5	00493613	M	42	23.5	170	55.2	CGN	Y	N	Y	N	N	0		4	119	3.76	0.35	5.6	40.9	409	37	1608	434	1.02	4.5	2.38	10	535	111	27	0.72973	72.973	91.8
125	2	5.6	01465446	M	57	51.4	168	53	DN	Y	N	N	N	N	2	AVF occlusion, cataract	4	112	3.44	0.32	5.3	42.8	1085	24.4	1085	374	1.99	4.6	2.31	7	343	82	17.4	0.713115	71.3115	88.6
126	1	3.4	01215070	F	39	35.6	153	40	CGN	Y	N	N	N	N	0		4	119	4	0.36	7.4	41.8	268	34.9	1122	537	2.67	5.1	2.24	7.6	322	95	27.3	0.782235	78.2235	79.2
127	1	4.1	00811899	F	86	81.9	153	45	CGN	Y	N	N	N	N	3	weakness, AVF occlusion	4	70	2.34	0.22	3.3	44.1	288	23.9	869	304	1.69	5.4	1.99	6.2	238	62	17.7	0.740586	74.0586	78.2
128	1	4.8	00562058	M	44	39.2	175	66.7	CGN	Y	N	N	N	N	1		4	85	2.99	0.26	3.4	39.7	309	33.8	1448	399	2.25	6	2.18	13.9	633	147	19.9	0.588757	58.8757	77.9
129	1	4.9	02397925	M	46	41.1	175	75	Polycystic kidney disease	Y	N	N	N	N	0		4	94	3.28	0.29	4.5	46.6	325	26.6	1104	468	1.83	3.9	2.09	9.3	402	128	17.3	0.650376	65.0376	74.8
130	1	4	02244067	M	38	34	163	53.8	CGN	Y	N	N	N	N	0		4	129	4.52	0.38	6.9	41.2	339	22.9	1214	436	1.97	4.3	1.95	6.7	427	103	16.2	0.707424	70.7424	73.2
131	1	3.5	02121469	M	49	45.5	178	78.5	CGN	Y	Y	N	N	N	1	anemia	4	59	2.33	0.19	6.7	37.9	167	21.8	770	384	1.2	3.3	2.1	9.4	347	160	12.4	0.568807	56.8807	72
132	1	3.5	02055537	M	58	54.5	178	74.8	CGN	Y	N	N	N	N	2	nausea	4	100	3.88	0.3	6.2	36.5	381	21.9	872	429	1.73	4.7	1.9	8.6	372	141	13.3	0.607306	60.7306	68.6
133	1	4.8	02289290	M	86	81.2			CGN	Y	N	N	N	N	0		4	100	3.47	0.31	3.2	38.5	230	27	302	566	1.23	4.1	2.2	8.1	114	147	18.9	0.7	70	68
134	1	3.3	02106315	F	69	65.7	169	57.3	CGN	Y	N	N	N	N	2	dizzy, AVF occlusion	4	78	2.62	0.23	4	42.3	300	26.2	901	426	1.87	4.9	2.11	7.9	297	101	18.3	0.698473	69.8473	67.9
135	1	2.3	01066409	M	65	62.7	170	70	CGN	Y	Y	N	N	N	2	AVF occlusion	4	103	3.39	0.31	8.1	42	429	36	967	472	2.53	4.7	2.15	14.3	410	163	21.7	0.602778	60.2778	64.1
136	1	2	03177422	F	31	29	169	85	CGN	Y	N	N	N	N	1	emesia	4	85	3	0.25	5.6	42.3	384	35.1	1139	468	2.51	6.1	2.21	13.9	474	154	21.2	0.603989	60.3989	56.3
137	2	6.2	01979018	M	80	73.8			CGN	Y	N	N	N	N	0		4	100	3.39	0.31	4.9	41	276	15.2	1033	369	1.75	4.7	1.86	5.3	402	113	9.9	0.651316	65.1316	44
138	1	3	02024265	M	46	43	173	67	CGN	Y	N	N	N	N	0		4	105	3.49	0.31	5.9	41.3	410	34.5	1236	433	1.97	5.8	2.1	11.1	442	109	23.4	0.678261	67.8261	41.9
139	1	3.2	02581641	F	73	69.8	155	50	CGN	Y	N	Y	N	N	2	anemia	4	101	3.59	0.32	6.3	44.3	326	28.9	719	457	2.21	5.2	2.22	7.7	228	104	21.2	0.733564	73.3564	37.2
140	2	17.9	00487613	M	47	29.1	170	54	CGN	Y	N	N	N	N	2	gastritis, AVF occlusion	4	98	3.26	0.29	4	38.5	366	34.7	2003	609	2.71	4.8	2.12	12.2	696	154	22.5	0.648415	64.8415	16.6
141	2	6	01440919	M	48	42	170	73.2	CGN	Y	N	N	N	N	0		4	107	3.66	0.32	7.1	42.3	406	29.8	1517	489	2.55	4.8	2.3	11.9	645	149	17.9	0.600671	60.0671	1073.6
142	1	4.5	03355390	M	64	59.5	171	60.7	Uric acid nephropathy	Y	N	N	N	N	0		4	106	3.45	0.33	4.7	39	206	23.1	917	483	1.54	5	1.74	8.1	351	134	15	0.649351	64.9351	1048.6
143	2	16.1	01046211	F	72	55.9	160	62.7	CGN	N	N	N	N	N	1	restless legs syndrome	4	104	3.55	0.33	6.5	38.9	425	34.3	884	422	2.37	7.1	2.37	8.3	270	98	26	0.758017	75.8017	1002.9
144	2	6	01046523	M	38	32	164	80	CGN	Y	N	N	N	N	0		4	96	3.31	0.29	4.6	39.9	407	29.5	1104	588	1.97	4.1	2.28	9.6	419	150	19.9	0.674576	67.4576	990.5
145	1	4.9	00926950	M	61	56.1	176	72.5	CGN	Y	Y	N	N	N	5	emesia, diarrhea, cough, coronary heart disease	4	102	3.43	0.31	5.3	40.1	309	28.3	1127	472	1.98	5.1	1.9	9.5	410	113	18.8	0.664311	66.4311	988.9
		1组 浅绿 44人-1	43
		2组 蓝 54人-2	52
		3组 白 39人-1	38
		4组 黄 8人+4	12
